# Supplementary material for: White light-triggered zwitterionic polymer nanoparticles based on an AIE-active photosensitizer for photodynamic antimicrobial therapy
Source: Royal Society of Chemistry journal article supplement (doi:10.1039/d0tb02272a), 2020-01-01
Supplement: d0tb02272a1.pdf [file d0tb02272a1.pdf]

## Supporting Information for White light triggered zwitterionic polymer nanoparticles based on AIE-active photosensitizer for photodynamic antimicrobial therapy †

Bibo Ren <sup>a, ‡</sup>, Kaijun Li <sup>a, ‡</sup>, Zheng Liu <sup>c</sup>, Gongyan Liu <sup>a, b\*</sup> and Haibo Wang <sup>a, b\*</sup>

<sup>a</sup>College of Biomass Science and Engineering, Sichuan University, Chengdu 610065, P R China.

<sup>b</sup>National Engineering Research Center of Clean Technology in Leather Industry, Sichuan University, Chengdu 610065, PR China.

<sup>c</sup>Jiangsu Province Special Equipment Safety Supervision and Inspection Institute, Wuxi 214170, PR China.

\*Corresponding authors: E-mail address: whb6985@scu.edu.cn (H. Wang); lgy\_3506@163.com (G. Liu) Tel: +86-28-85401296.

‡These authors contributed equally to this paper.

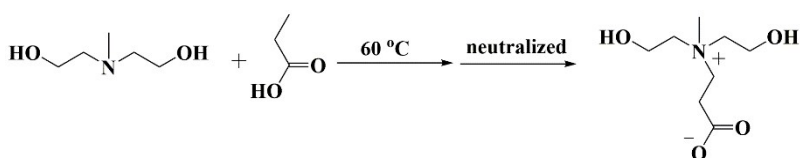

Scheme S1. Synthetic route to compound DHCB.

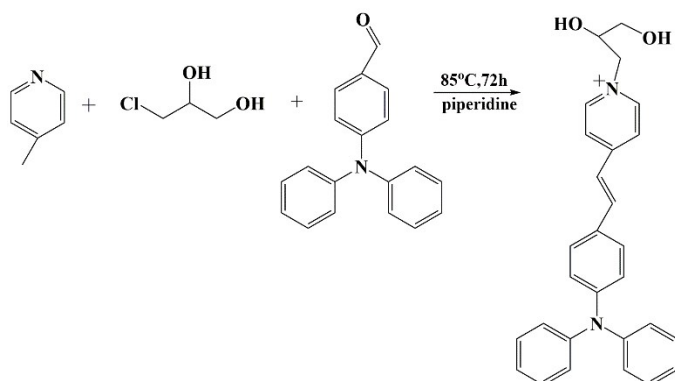

Scheme S2. Synthetic route to compound DHTPY.

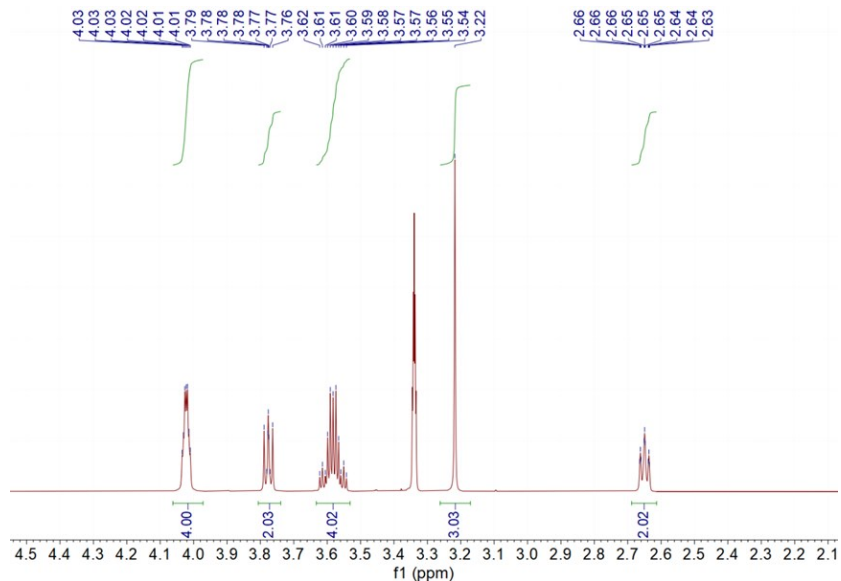

**Figure S1.**  $^1\text{H}$  NMR spectrum of DHCB (MeOD).

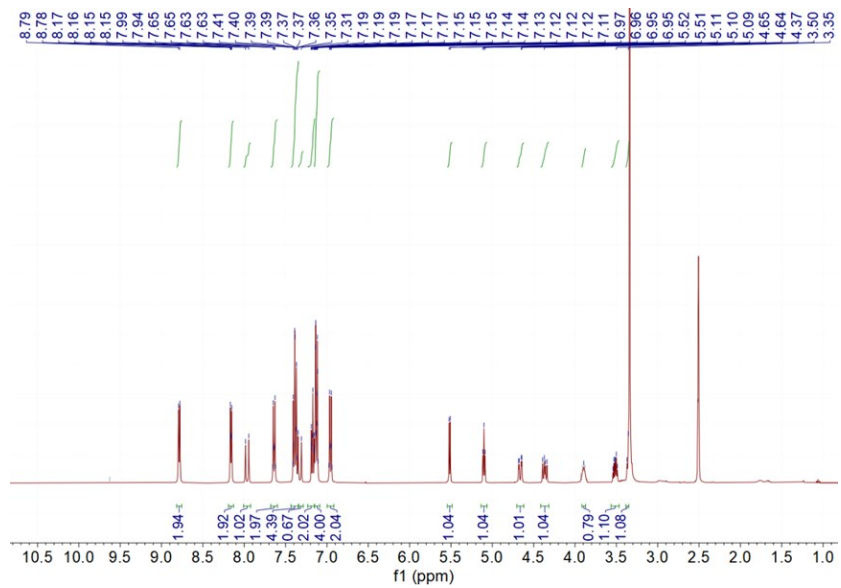

**Figure S2.**  $^1\text{H}$  NMR spectrum of DHTPY (DMSO).

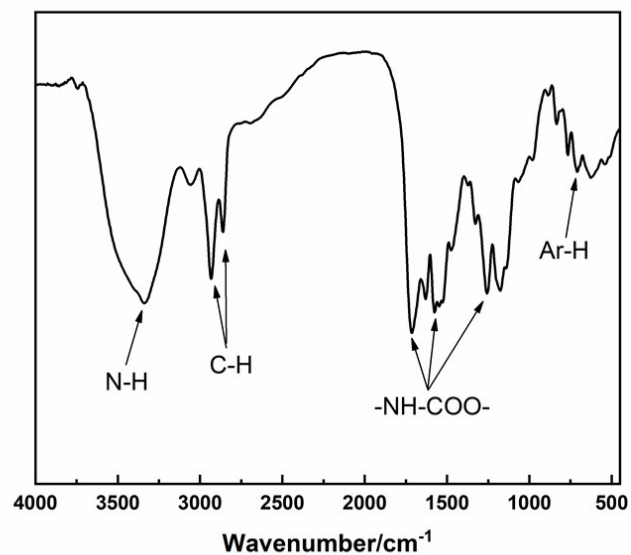

**Figure S3.** FT-IR spectrum of PUs.

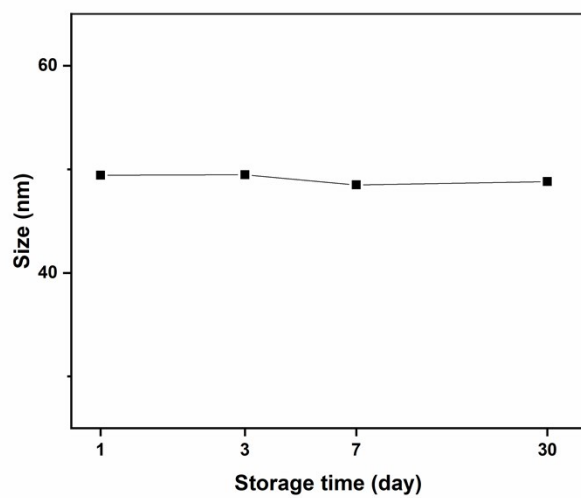

**Figure S4.** Average hydrodynamic diameter changes of PU nano-micelles for 30 days.

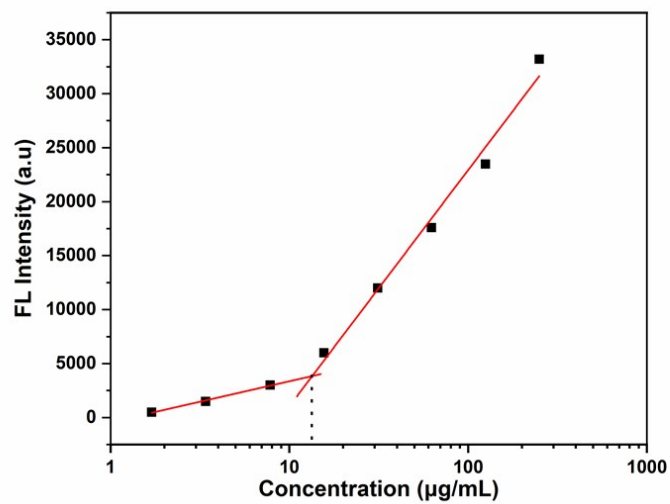

**Figure S5.** The CMC of PU nano-micelles determined by different concentrations of FL spectra.

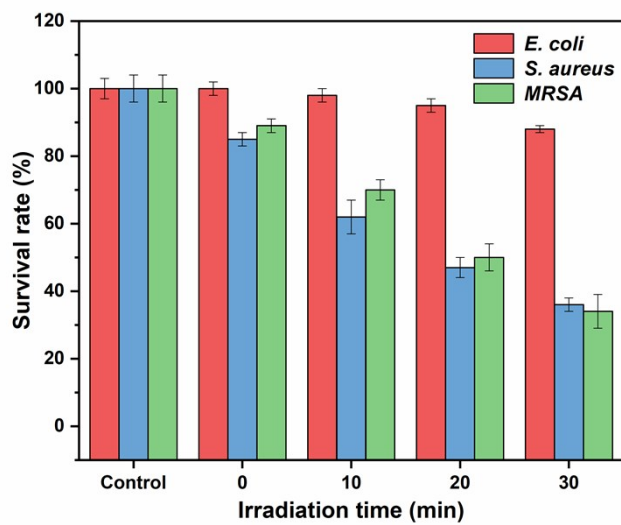

**Figure S6.** Antibacterial activity of PU nano-micelles (20 µg/mL) toward *E. coli*, *S. aureus* and MRSA under white light irradiation for different time at normal condition.
